# Supplementary material for: The Adsorption of P2X2 Receptors Interacting with IgG Antibodies Revealed by Combined AFM Imaging and Mechanical Simulation
Source: MDPI journal article supplement (doi:10.3390/ijms25010336), 2023-12-26
Supplement: s1 [file s1]

## Supplementary Material

*Article*

# The Adsorption of P2X2 Receptors Interacting with IgG Antibodies Revealed by Combined AFM Imaging and Mechanical Simulation

Eduardo A. Santander <sup>1,+</sup>, Graciela Bravo <sup>1,2,+</sup>, Yuan Chang-Halabi <sup>1</sup>, Gabriel J. Olguín-Orellana <sup>1</sup>, Pamela A. Naulin <sup>1</sup>, Mario J. Barrera <sup>1</sup>, Felipe A. Montenegro <sup>1</sup>, and Nelson P. Barrera <sup>1,\*</sup>

<sup>1</sup> Laboratory of Nanophysiology and Structural Biology, Faculty of Biological Sciences, Pontificia Universidad Católica de Chile, Alameda 340, Santiago 8331150, Chile

<sup>2</sup> Department of Chemical and Bioprocess Engineering, School of Engineering, Pontificia Universidad Católica de Chile, Santiago 7820436, Chile

<sup>+</sup> These authors contributed equally to this work.

<sup>\*</sup> Correspondence: nbarrera@bio.puc.cl

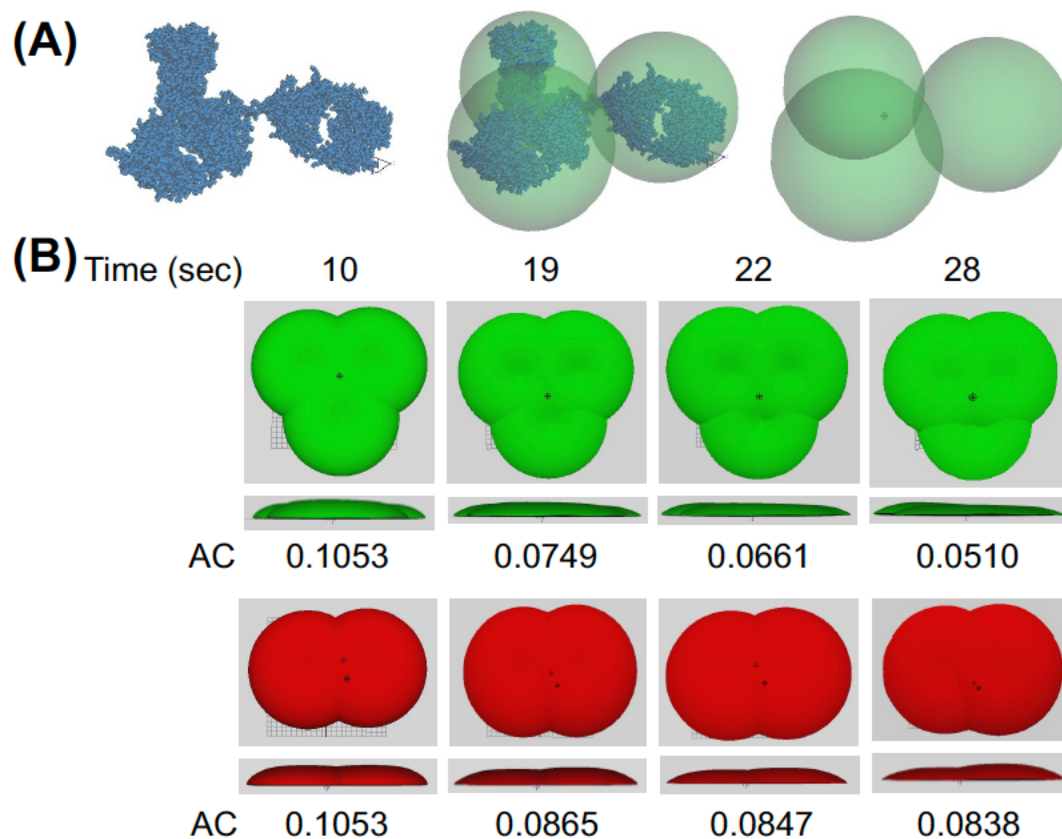

**Supplementary Figure S1.** Adsorption analysis of anti-His6 IgG antibody by mechanical simulation under reduced number of interconnected nodes. **(A)** All-atom structural representation model of the IgG antibody (PDB ID: 1HZH) in the extended orientation, followed by the interconnected nodes model and the 3D sphere-like shape model used for simulation., **(B)** Snapshots of the adsorption process of IgG antibody model in extended orientation (top) and up-orientation (bottom). Corresponding time and AC values during adsorption simulations are indicated.
